# Supplementary material for: PPAR-γ Agonist GW1929 Targeted to Macrophages with Dendrimer–Graphene Nanostars Reduces Liver Fibrosis and Inflammation
Source: MDPI journal article supplement (doi:10.3390/pharmaceutics15051452), 2023-05-10
Supplement: s1 [file s1]

Article

# PPAR- $\gamma$ Agonist GW1929 Targeted to Macrophages with Dendrimer–Graphene Nanostars Reduces Liver Fibrosis and Inflammation

Alazne Moreno-Lanceta <sup>1,2</sup>, Mireia Medrano-Bosch <sup>1</sup>, Blanca Simón-Codina <sup>1</sup>, Montserrat Barber-González <sup>1</sup>, Wladimiro Jiménez <sup>1,2</sup> and Pedro Melgar-Lesmes <sup>1,2,3,\*</sup>

<sup>1</sup> Department of Biomedicine, School of Medicine, University of Barcelona, 08036 Barcelona, Spain; amorenol@recerca.clinic.cat (A.M.-L.)

<sup>2</sup> Biochemistry and Molecular Genetics Service, Hospital Clínic Universitari, Instituto de Investigaciones Biomédicas August Pi i Sunyer (IDIBAPS), Centro de Investigación Biomédica en Red de Enfermedades Hepáticas y Digestivas (CIBERehd), 08036 Barcelona, Spain

<sup>3</sup> Institute for Medical Engineering and Science, Massachusetts Institute of Technology, Cambridge, MA 02139, USA

\* Correspondence: pmelgar@ub.edu; Tel.: +34-934020294

**Table S1.** Serum parameters of liver damage (alanine aminotransferase (ALT) and aspartate aminotransferase (AST)) and liver function (albumin and total protein) in fibrotic mice treated with dendrimer-graphene nanostars linked to mannitol (DGNS-Man) or GW1929 (DGNS-GW).

| Serum parameter     | DGNS-Man (N=6)   | DGNS-GW (N=6)     |
|---------------------|------------------|-------------------|
| ALT (U/L)           | 37.13 $\pm$ 9.12 | 40.46 $\pm$ 5.46  |
| AST (U/L)           | 277.8 $\pm$ 155  | 332.4 $\pm$ 66.87 |
| Albumin (g/L)       | 27.05 $\pm$ 0.22 | 27.19 $\pm$ 0.37  |
| Total protein (g/L) | 49.53 $\pm$ 0.77 | 47.65 $\pm$ 0.89  |

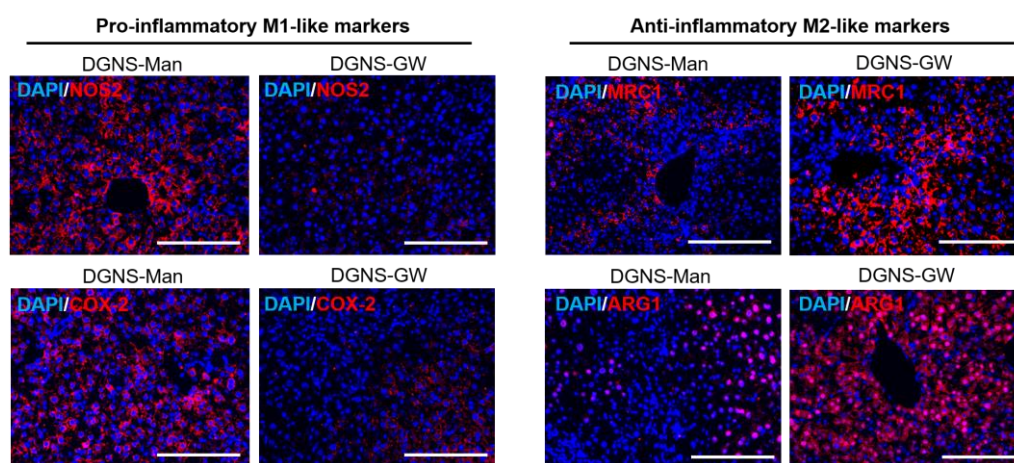

**Figure S1.** Immunofluorescent staining of pro-inflammatory M1-like markers (NOS2 and COX-2) and anti-inflammatory M2-like markers (MRC1 and ARG1) in the liver of in fibrotic mice treated with dendrimer-graphene nanostars linked to mannitol (DGNS-Man) or GW1929 (DGNS-GW). Scale bar: 250  $\mu$ m.
